# Supplementary material
Source: Springer Nature journal article supplement (https://www.springermedizin.de/resource/supplementary/12990_2007_109_MOESM4_ESM.pdf/9612586)

HEK293:TRPV1/ET<sub>B</sub>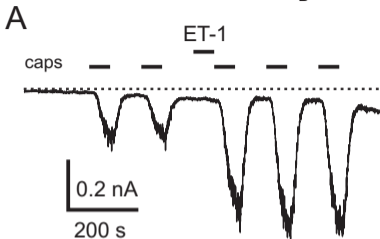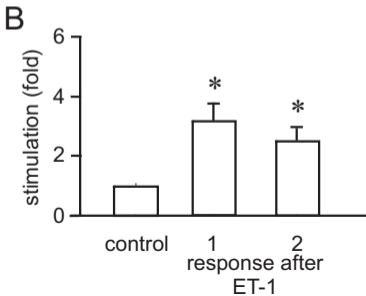

Supplement: MOESM4 [file 9612586]
